# Supplementary material
Source: PubMed Central journal article supplement (PMC4678594)
Supplement: NIHMS66171-supplement-Supplementary_Table_1.pdf [file NIHMS66171-supplement-Supplementary_Table_1.pdf]

Supplementary Table 1: Prevalence and incidence studies of AD-DS since 1995<sup>1-11</sup>

| Reference                                                     | Study Design and population                          | Location sample size       | Dementia Criteria                                                | Age                              | Prevalence (%)              | Incidence                                                     | Survival                |
|---------------------------------------------------------------|------------------------------------------------------|----------------------------|------------------------------------------------------------------|----------------------------------|-----------------------------|---------------------------------------------------------------|-------------------------|
| McCarron et al 2014                                           | Longitudinal institutional                           | Ireland n = 77 (all women) | ICD10                                                            | By 50<br>By 55<br>By 60<br>By 68 |                             | Cumulative incidence:<br>26.10%<br>50.70%<br>79.70%<br>95.70% | Median survival 7 years |
| Margallo-Lana, et al., 2007                                   | Longitudinal institutional                           | UK n = 92                  | ICD10 Neuropathological confirmation in majority                 | 45-49<br>50-54<br>55-59<br>60+   |                             | Per 100 person years<br>0.99<br>3.4<br>7.4<br>7.5             | Mean survival 3.5 years |
| Coppus, et al., 2006                                          | Longitudinal community and institutional (4 regions) | The Netherlands n = 506    | ICD10                                                            | 45-49<br>50-54<br>55-59<br>60+   | 8.9<br>17.7<br>32.1<br>25.6 | Per 100 person years<br>2.5<br>2.8<br>4.9<br>13.3             |                         |
| Zigman et al, 2002                                            | Longitudinal community                               | US n = 248                 | Significant functional decline                                   | By 50<br>By 72                   |                             | Cumulative incidence<br>4.00%<br>67.00%                       |                         |
| Tyrrell, et al., 2001                                         | Cross-sectional community and institutional          | Ireland n = 285            | DSM IV                                                           | 35-40<br>40-49<br>50-59<br>60+   | 1.4<br>5.7<br>30.4<br>41.7  |                                                               |                         |
| Van Buggenhout, et al., 1999                                  | Cross-sectional one large Institution                | The Netherlands n = 96     | Clinical diagnoses                                               | 40-49<br>50-59                   | 11.1<br>42.4                |                                                               |                         |
| Holland, et al., 1998; Holland, Hon, Huppert, & Stevens, 2000 | Longitudinal community and institutional             | UK n= 68                   | ICD10; DSM IV, CAMDEX-AD, DLB and FTD criteria                   | 30-39<br>40-49<br>50-59          | 20.7<br>20.7<br>40          | new cases over 18 months<br>26.10%<br>26.30%<br>22.20%        |                         |
| Oliver 1998                                                   | Longitudinal community                               | UK n = 57                  | Moderate to severe cognitive decline on neuropsychological tests | 30-39<br>40-49<br>50 +           |                             | Decline over 50 months<br>11.80%<br>23.10%<br>70.00%          |                         |
| Sekijima, et al., 1998                                        | Longitudinal Institutional                           | Japan n = 106              | Clinical diagnoses                                               | 30-39<br>40-49                   | 0<br>16                     |                                                               |                         |
| Visser, et al., 1997                                          | Longitudinal Institutional                           | The Netherlands n = 307    | Significant deterioration/ symptoms of dementia                  | <39<br>40-49<br>50-59<br>60-69   | 0<br>11<br>66<br>77         |                                                               |                         |

## Reference List

1. Coppus,A. *et al.* Dementia and mortality in persons with Down's syndrome. *Journal of Intellectual Disability Research* **50**, 768-777 (2006).
2. Holland,A.J., Hon,J., Huppert,F.A., Stevens,F., & Watson,P. Population-based study of the prevalence and presentation of dementia in adults with Down's syndrome. *British Journal of Psychiatry* **172**, 493-498 (1998).
3. Holland,A.J., Hon,J., Huppert,F.A., & Stevens,F. Incidence and course of dementia in people with Down's syndrome: findings from a population-based study. *J Intellect. Disabil. Res* **44**, 138-146 (2000).
4. Margallo-Lana,M.L. *et al.* Fifteen-year follow-up of 92 hospitalized adults with Down's syndrome: incidence of cognitive decline, its relationship to age and neuropathology. *Journal of Intellectual Disability Research* **51**, 463-477 (2007).
5. McCarron,M., McCallion,P., Reilly,E., & Mulryan,N. A prospective 14-year longitudinal follow-up of dementia in persons with Down syndrome. *Journal of Intellectual Disability Research* **58**, 61-70 (2014).
6. Oliver,C., Crayton,L., Holland,A., Hall,S., & Bradbury,J. A four year prospective study of age-related cognitive change in adults with Down's syndrome. *Psychological Medicine* **28**, 1365-1377 (1998).
7. Sekijima,Y. *et al.* Prevalence of dementia of Alzheimer type and apolipoprotein E phenotypes in aged patients with Down's syndrome. *European Neurology* **39**, 234-237 (1998).
8. Tyrrell,J. *et al.* Dementia in people with Down's syndrome. *International Journal of Geriatric Psychiatry* **16**, 1168-1174 (2001).
9. Van Buggenhout,G.J.C.M. *et al.* Down syndrome in a population of elderly mentally retarded patients: Genetic-diagnostic survey and implications for medical care. *American Journal of Medical Genetics* **85**, 376-384 (1999).
10. Visser,F.E., Aldenkamp,A.P., vanHuffelen,A.C., Kuilman,M., & Overweg,J. Prospective study of the prevalence of Alzheimer-type dementia in institutionalized individuals with Down syndrome. *American Journal on Mental Retardation* **101**, 400-412 (1997).
11. Zigman,W.B., Schupf,N., Urv,T., Zigman,A., & Silverman,W. Incidence and temporal patterns of adaptive behavior change in adults with mental retardation. *American Journal on Mental Retardation* **107**, 161-174 (2002).
