# Supplementary material
Source: PubMed Central journal article supplement (PMC4678594)
Supplement: NIHMS66171-supplement-Supplementary_Table_2.pdf [file NIHMS66171-supplement-Supplementary_Table_2.pdf]

Supplementary Table 2: AD-DS neuropathological studies<sup>1-17</sup>

| Reference                 | Number of Cases in study (age range) | Aβ amorphous plaque<br>Earliest case (years)<br>(number of cases) | Aβ dense-cored plaque<br>Earliest case (years)<br>(number of cases) | Cerebral amyloid angiopathy<br>Earliest case (years)<br>(number of cases) | Neurofibrillary tangles<br>Earliest case (years)<br>(number of cases) |
|---------------------------|--------------------------------------|-------------------------------------------------------------------|---------------------------------------------------------------------|---------------------------------------------------------------------------|-----------------------------------------------------------------------|
| Burger and Vogel 1973     | 13 (12-65 years)                     | NR                                                                | 17 (11/13)                                                          | NR                                                                        | 38 (8/13)                                                             |
| Ball and Nuttall 1980     | 5 (21-62 years)                      | NR                                                                | 21 (5/5)                                                            | NR                                                                        | 21 (5/5)                                                              |
| Roper and Williams 1980   | 20 (30-64 years)                     | NR                                                                | 30 (20/20)                                                          | NR                                                                        | 30 (20/20)                                                            |
| Whalley 1982              | 10 (13-58 years)                     | NR                                                                | 53 (7/10)                                                           | NR                                                                        | 53 (7/10)                                                             |
| Wisniewski et al 1985a    | 7 (47-65 years)                      | NR                                                                | 47(7/7)                                                             | NR                                                                        | 47 (7/7)                                                              |
| Wisniewski et al 1985b    | 100 (0-80 years)                     | NR                                                                | 11-20 years*<br>(56/100)                                            | NR                                                                        | 11-20* (56/100)                                                       |
| Mann et al 1986           | 12 (31-65 years)                     | 37 (11/12)                                                        | 37 (11/12)                                                          | NR                                                                        | 37 (11/12)                                                            |
| Godridge et al 1987       | 5 (34-64 years)                      | NR                                                                | 52 (4/5)                                                            | NR                                                                        | 52 (3/5)                                                              |
| Mann and Esiri 1989       | 13 (13-50 years)                     | 31 (12/13)                                                        | 37 (11/13)                                                          | NR                                                                        | 37 (11/13)                                                            |
| Motte and Willams 1989    | 15 (25-59 years)                     | 25 (13/14)                                                        | 48 (8/14)                                                           | 48 (6/15)                                                                 | 48 (8/15)                                                             |
| Murphy et al 1990         | 6 (19-64 years)                      | 19 (6/6)                                                          | 19 (3/6)                                                            | NR                                                                        | 56 (2/6)                                                              |
| Lemere et al 1996         | 29 (3-73 years)                      | 12 (20/29)                                                        | 15 (17/29)                                                          | 46 (6/29)                                                                 | 29 (16/29)                                                            |
| Iwatsubo et al 1995       | 16 (31-64 years)                     | 31 (16/16)                                                        | 44 (13/16)                                                          | 31 (16/16)                                                                | NR                                                                    |
| Leverenz and Raskind 1998 | 42 (4 days – 38 years)               | 8 (18/42)                                                         | 28(3/42)                                                            | NR                                                                        | 28 (3/42)                                                             |
| Hirayama et al 2003       | 20 (21 weeks gestation – 60 years)   | 32 (9/20)                                                         | 32 (9/20)                                                           | NR                                                                        | NR                                                                    |
| Head et al 2003           | 15 (5 months -67 years)              | 31 (14/15)                                                        | 31 (14/15)                                                          | NR                                                                        | 37(13/15)                                                             |
| Margallo-Lana et al 2007  | 16 (43-76years)                      | NR                                                                | 43 (16/16)                                                          | NR                                                                        | 44 (15/16)                                                            |

\* Age range only not age of first case  
NR – not reported

Reference List

1. Ball,M.J. & Nuttall,K. Neurofibrillary Tangles, Granulovacuolar Degeneration, and Neuron Loss in Down Syndrome - Quantitative Comparison with Alzheimer Dementia. *Annals of Neurology* **7**, 462-465 (1980).
2. Burger,P.C. & Vogel,F.S. Development of Pathologic-Changes of Alzheimers Disease and Senile Dementia in Patients with Downs-Syndrome. *American Journal of Pathology* **73**, 457-476 (1973).
3. Godridge,H., Reynolds,G.P., Czudek,C., Calcutt,N.A., & Benton,M. Alzheimer-Like Neurotransmitter Deficits in Adult Downs-Syndrome Brain-Tissue. *Journal of Neurology Neurosurgery and Psychiatry* **50**, 775-778 (1987).
4. Head,E. *et al.* Parallel compensatory and pathological events associated with Tau pathology in middle aged individuals with Down Syndrome. *Journal of Neuropathology and Experimental Neurology* **62**, 917-926 (2003).
5. Hirayama,A., Horikoshi,Y., Maeda,M., Ito,M., & Takashima,S. Characteristic developmental expression of amyloid beta 40, 42 and 43 in patients with Down syndrome. *Brain & Development* **25**, 180-185 (2003).

6. Iwatsubo,T., Mann,D.M.A., Odaka,A., Suzuki,N., & Ihara,Y. Amyloid-Beta Protein (A-Beta) Deposition - A-Beta-42(43) Precedes A-Beta-40 in Down-Syndrome. *Annals of Neurology* **37**, 294-299 (1995).
7. Lemere,C.A. *et al.* Sequence of deposition of heterogeneous amyloid beta-peptides and APO E in Down syndrome: Implications for initial events in amyloid plaque formation. *Neurobiology of Disease* **3**, 16-32 (1996).
8. Leverenz,J.B. & Raskind,M.A. Early amyloid deposition in the medial temporal lobe of young Down syndrome patients: A regional quantitative analysis. *Experimental Neurology* **150**, 296-304 (1998).
9. Mann,D.M.A., Yates,P.O., Marcyniuk,B., & Ravindra,C.R. The Topography of Plaques and Tangles in Downs-Syndrome Patients of Different Ages. *Neuropathology and Applied Neurobiology* **12**, 447-457 (1986).
10. Mann,D.M.A. & Esiri,M.M. The Pattern of Acquisition of Plaques and Tangles in the Brains of Patients Under 50 Years of Age with Downs-Syndrome. *Journal of the Neurological Sciences* **89**, 169-179 (1989).
11. Margallo-Lana,M.L. *et al.* Fifteen-year follow-up of 92 hospitalized adults with Down's syndrome: incidence of cognitive decline, its relationship to age and neuropathology. *Journal of Intellectual Disability Research* **51**, 463-477 (2007).
12. Motte,J. & Williams,R.S. Age-Related-Changes in the Density and Morphology of Plaques and Neurofibrillary Tangles in Down Syndrome Brain. *Acta Neuropathologica* **77**, 535-546 (1989).
13. Murphy,G.M. *et al.* Antigenic Profile of Plaques and Neurofibrillary Tangles in the Amygdala in Downs-Syndrome - A Comparison with Alzheimers-Disease. *Brain Research* **537**, 102-108 (1990).
14. Ropper,A.H. & Williams,R.S. Relationship Between Plaques, Tangles, and Dementia in Down Syndrome. *Neurology* **30**, 639-644 (1980).
15. Whalley,L.J. The Dementia of Downs-Syndrome and Its Relevance to Etiological Studies of Alzheimers-Disease. *Annals of the New York Academy of Sciences* **396**, 39-53 (1982).
16. Wisniewski,K.E., Dalton,A.J., Mclachlan,D.R.C., Wen,G.Y., & Wisniewski,H.M. Alzheimers-Disease in Downs-Syndrome - Clinicopathologic Studies. *Neurology* **35**, 957-961 (1985).
17. Wisniewski,K.E., Wisniewski,H.M., & Wen,G.Y. Occurrence of Neuropathological Changes and Dementia of Alzheimers-Disease in Down Syndrome. *Annals of Neurology* **17**, 278-282 (1985).
