# Supplementary material
Source: PubMed Central journal article supplement (PMC4678594)
Supplement: NIHMS66171-supplement-Supplementary_Table_3.pdf [file NIHMS66171-supplement-Supplementary_Table_3.pdf]

Supplementary Table 3 DupAPP clinical and pathological summary<sup>1-11</sup>

| Reference                                              | Affected individuals                                          | Size of duplication                                       | Age of onset of AD/ ICH (years)                   | Seizures                                | ICH/ strokes                   | Neuropathology                                                              |
|--------------------------------------------------------|---------------------------------------------------------------|-----------------------------------------------------------|---------------------------------------------------|-----------------------------------------|--------------------------------|-----------------------------------------------------------------------------|
| Rovelet-Lecrux et al, 2006                             | 5 kindreds (14 confirmed cases) France                        | 0.58 Mb – 6.37 Mb                                         | 42 – 59 (in all confirmed cases)                  | Not reported                            | 4 / 14 (29%)                   | 5 cases from 3 kindreds AD + severe CAA; micro infarcts in 3                |
| Sleegers et al, 2006                                   | 1 kindred (4 confirmed cases) and 1 other proband Netherlands | 0.7 Mb                                                    | 53 – 62 (in all confirmed cases)                  | 3 / 4 (75%)                             | several in kindred had strokes | 1 case – AD + CAA                                                           |
| Rovelet-Lecrux et al, 2006 & Rovelet-Lecrux et al 2007 | 1 kindred, 14 affected individuals Finland                    | 0.55 Mb                                                   | 40 – 54 (in all affected cases)                   | 2 / 14 (14%)                            | 5 / 14 (36%)                   | 3 cases - AD + CAA                                                          |
| Thonberg et al, 2011                                   | 1 proband Sweden                                              | 1.09 Mb                                                   | 55                                                | Not reported                            | -                              | -                                                                           |
| Kasuga et al, 2011                                     | 2 probands Japan                                              |                                                           | 52 – 53                                           | None                                    | 1 / 2 (50%, on CT scan)        | -                                                                           |
| Wallon et al, 2012                                     | 7 kindreds, 19 affected individuals France                    | 0.83 Mb – 14.7 Mb                                         | 41 – 64 (in all affected cases)                   | 16 / 19 cases (84%; index symptom in 2) | Cases in all 7 kindreds        | 5 cases - moderate to severe AD + severe CAA<br>1 case cortical Lewy Bodies |
| McNaughton et al, 2012                                 | 5 probands UK                                                 | 1.6 – 6.6 Mb; one with interrupted duplication of 15.5 Mb | 39 – 61 (in all affected probands)                | 4/4 (100%)                              | 1 / 5 (20%)                    | -                                                                           |
| Hooli et al, 2012 ; Hooli et al, 2014                  | 2 kindreds, 5 affected individuals USA                        | 0.38 Mb (APP only) & 3.4 Mb                               | 43 – 52 years; one case with no disease at age 60 | -                                       | -                              | -                                                                           |
| Swaminathan et al, 2012                                | 1 proband USA                                                 | 0.5 Mb                                                    | 59                                                | Not reported                            | Not reported                   | Not reported                                                                |
| Llado et al, 2014                                      | 1 proband Spain                                               | 14.5 Mb                                                   | 54                                                | -                                       | Yes (presented with ICH)       | AD + severe CAA                                                             |

Reference List

1. Hooli,B.V. *et al.* Role of common and rare APP DNA sequence variants in Alzheimer disease. *Neurology* **78**, 1250-1257 (2012).
2. Hooli,B.V. *et al.* Rare autosomal copy number variations in early-onset familial Alzheimer's disease. *Molecular Psychiatry* **19**, 676-681 (2014).
3. Kasuga,K. *et al.* Identification of independent APP locus duplication in Japanese patients with early-onset Alzheimer disease. *Journal of Neurology Neurosurgery and Psychiatry* **80**, 1050-1052 (2009).
4. Llado,A. *et al.* Large APP locus duplication in a sporadic case of cerebral haemorrhage. *Neurogenetics* **15**, 145-149 (2014).

5. McNaughton,D. *et al.* Duplication of amyloid precursor protein (APP), but not prion protein (PRNP) gene is a significant cause of early onset dementia in a large UK series. *Neurobiol Aging*(2010).
6. Rovelet-Lecrux,A. *et al.* APP locus duplication causes autosomal dominant early-onset Alzheimer disease with cerebral amyloid angiopathy. *Nat Genet* **38**, 24-26 (2006).
7. Rovelet-Lecrux,A. *et al.* APP locus duplication in a Finnish family with dementia and intracerebral haemorrhage. *Journal of Neurology Neurosurgery and Psychiatry* **78**, 1158 (2007).
8. Sleegers,K. *et al.* APP duplication is sufficient to cause early onset Alzheimer's dementia with cerebral amyloid angiopathy. *Brain* **129**, 2977-2983 (2006).
9. Swaminathan,S. *et al.* Analysis of Copy Number Variation in Alzheimer's Disease in a Cohort of Clinically Characterized and Neuropathologically Verified Individuals. *Plos One* **7**, (2012).
10. Thonberg,H. *et al.* Mutation screening of patients with Alzheimer disease identifies APP locus duplication in a Swedish patient. *BMC Research Notes* **4**, 476 (2011).
11. Wallon,D. *et al.* The French Series of Autosomal Dominant Early Onset Alzheimer's Disease Cases: Mutation Spectrum and Cerebrospinal Fluid Biomarkers. *Journal of Alzheimers Disease* **30**, 847-856 (2012).
